# Supplementary material for: Adsorption and degradation of Congo red on a jarosite-type compound
Source: Royal Society of Chemistry journal article supplement (doi:10.1039/c6ra19125h), 2016-01-01
Supplement: c6ra19125h1.pdf [file c6ra19125h1.pdf]

## Adsorption and Degradation of Congo Red on a Jarosite-type Compound

Yu Dong,<sup>a</sup> Ziting Wang,<sup>a</sup> Xin Yang,<sup>a</sup> Meiyong Zhu,<sup>b</sup> Rufen Chen,<sup>a,c</sup>  
Bin Lu,<sup>a,c</sup> Hui Liu,<sup>a,c\*</sup>

<sup>a</sup> College of Chemistry and material Science, Hebei Normal University, Shijiazhuang, 050024, China

<sup>b</sup> Chemical Group, Hebei Medical University, Shijiazhuang, 050017, China

<sup>c</sup> Key Laboratory of Inorganic Nanomaterial of Hebei Province, Shijiazhuang, 050024, China

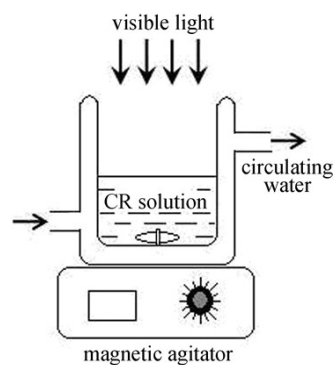

Fig. S1 The scheme of the photoreactor

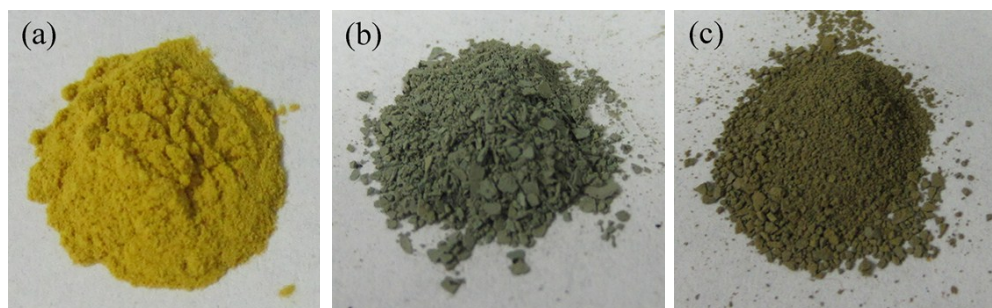

Fig. S2 The digital photos of natrojarosite (a) before adsorption; (b) after adsorption; (c) washed by distilled water under ultrasonic after adsorption

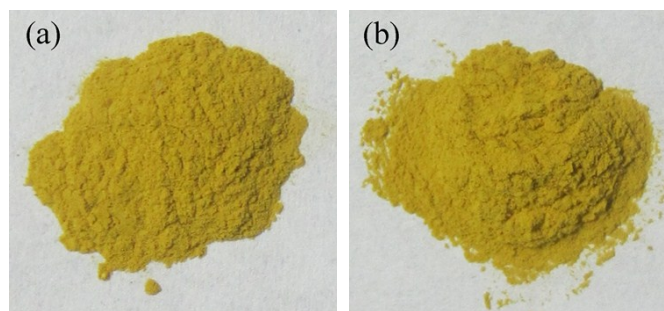

Fig. S3 The digital photos of natrojarosite (a) before degradation; (b) after degradation

Table S1 The main chemical component in natrojarosite before and after degradation

| Elements           |                        | Na(K) | S(K)  | Fe(K) | O(K)  |
|--------------------|------------------------|-------|-------|-------|-------|
| Before degradation | quality percentage (%) | 3.26  | 12.91 | 24.41 | 59.42 |
|                    | mole percentage (%)    | 3.37  | 8.55  | 9.29  | 78.79 |
| After degradation  | quality percentage (%) | 3.32  | 13.71 | 31.47 | 51.50 |
|                    | mole percentage (%)    | 3.43  | 9.82  | 12.86 | 73.89 |

Table S2 The parameters of crystal cell and d-values of typical peaks of natrojarosite before and after degradation

|             | Before degradation | After degradation |
|-------------|--------------------|-------------------|
| a (Å)       | 7.3401             | 7.3306            |
| c (Å)       | 16.6507            | 16.6494           |
| (113)       | 3.0616             | 3.0311            |
| d (Å) (021) | 3.1235             | 3.0877            |
| (012)       | 5.0623             | 4.9690            |
